# Supplementary material for: Alkali-Catalyzed Organosolv Treatment of Oat Bran for Enhanced Release of Hydroxycinnamate Antioxidants: Comparison of 1- and 2-Propanol
Source: MDPI journal article supplement (doi:10.3390/environments10070118), 2023-07-06
Supplement: s1 [file s1]

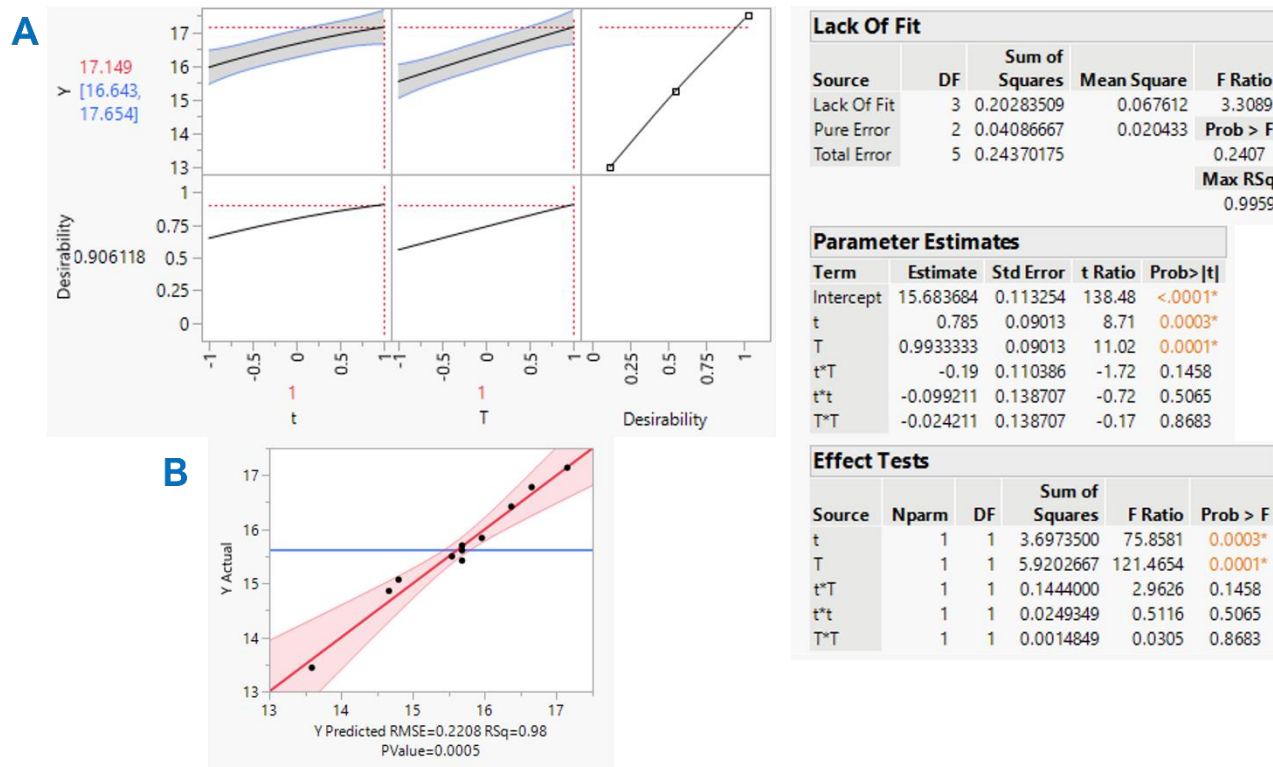

**Figure S1:** Data associated with the response surface methodology, implanted to optimize the 1-propanol organosolv treatment. A, desirability function; B, correlation between actual (measured) and predicted values. Number designated with different color in the inset tables denote statistically different values.

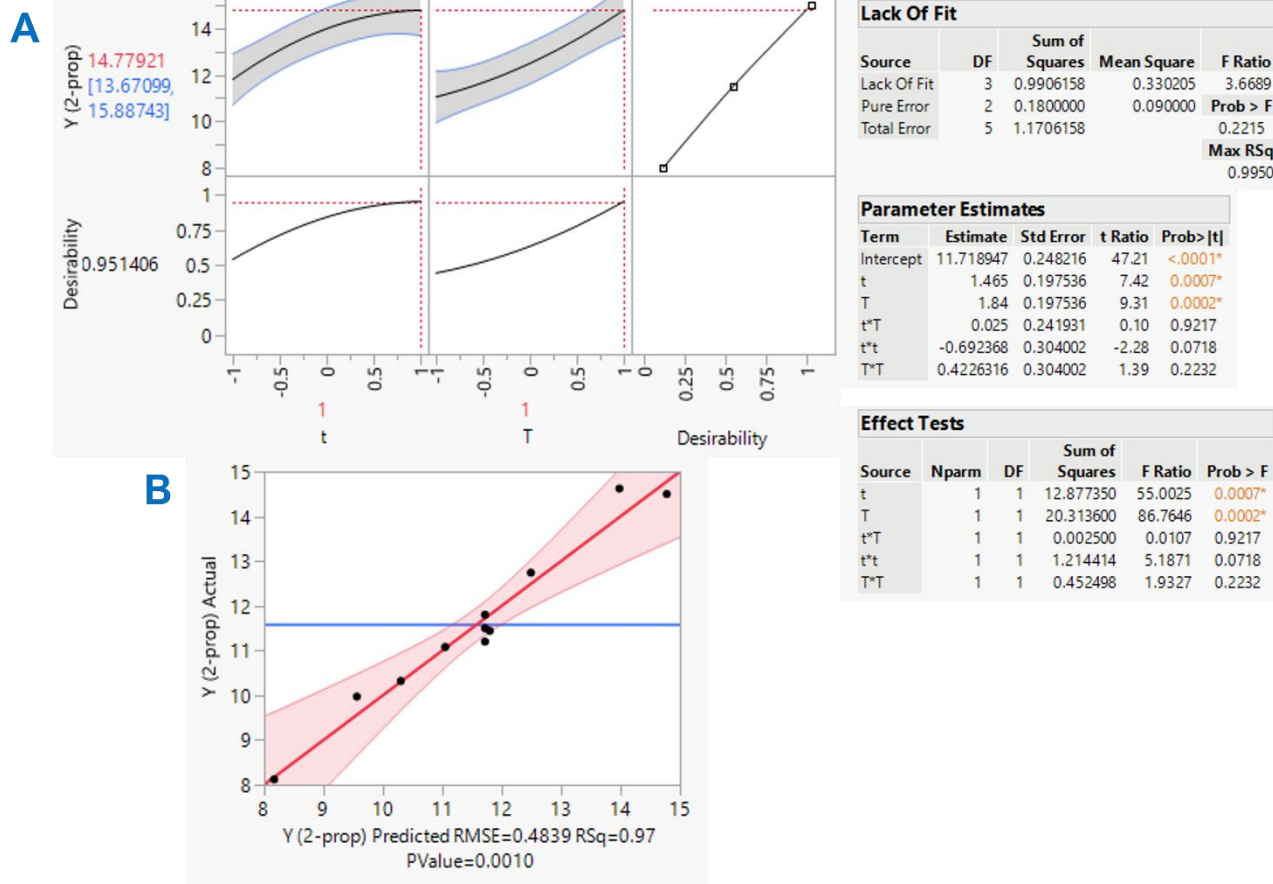

**Figure S2:** Data associated with the response surface methodology, implanted to optimize the 2-propanol organosolv treatment. A, desirability function; B, correlation between actual (measured) and predicted values. Number designated with different color in the inset tables denote statistically different values.

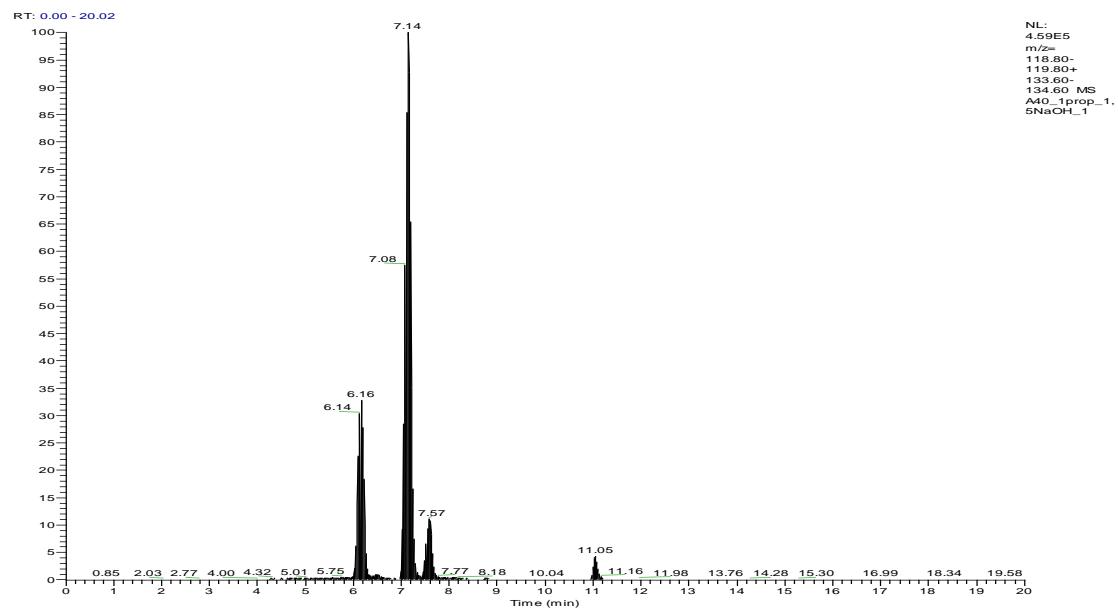

**Figure S3:** A representative total ion chromatogram of 1-propanol extract obtained under optimized conditions: RT 6.16 min, p-coumaric acid; RT 7.14 min, ferulic acid).

**p-Coumaric acid:**  $m/z$  163.1 $\rightarrow$ 119.3, 163.1 $\rightarrow$ 93.3

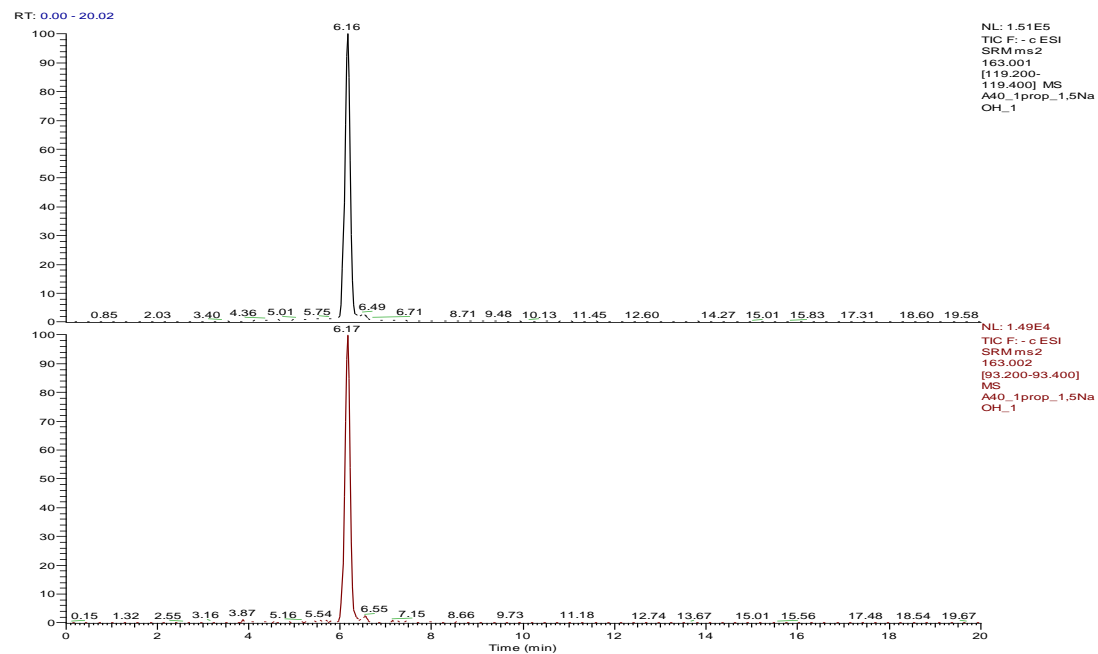

**Ferulic acid:**  $m/z$  193 $\rightarrow$ 134.1, 193 $\rightarrow$ 178.1

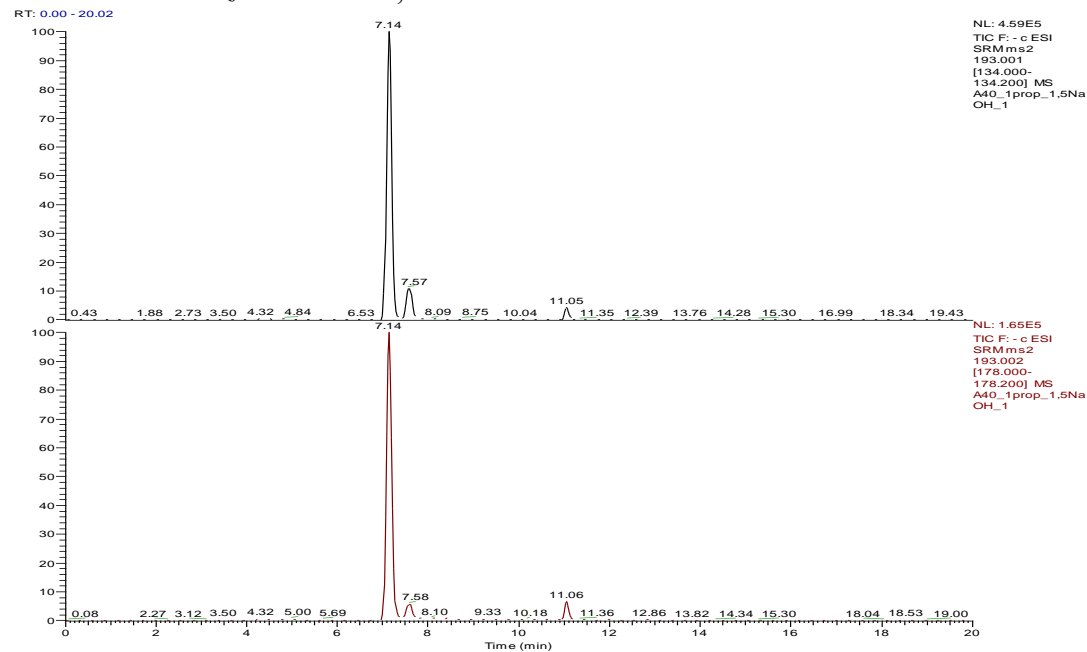

**Figure S4:** Fragmentation patterns of p-coumaric and ferulic acids.
